# Supplementary material
Source: publisher figshare collection journal article supplement (https://gsajournals.figshare.com/ndownloader/files/30848170)
Supplement: Supplementary file 1 [file 30848170]

## Sheet: Sheet1
Table S4 Carbon assimilation profile.
			K. quercitrusa var. comoensis	K. quercitrusa var. filamentosus	B. botsteinii sp. nov.
			1112	1120	1118T
		L-Arabinose	++	+	++
		N-Acetyl-D-Glucosamine	0	+++	0
		D-Saccharic Acid	0	0	0
		Succinic Acid	0	0	+
		D-Galactose	++	++	0
		L-Aspartic Acid	0	++	++
		L-Proline	0	+	+++
		D-Alanine	0	0	+
		D-Trehalose	0	+++	0
		D-Mannose	++	+++	+++
		Dulcitol	0	+	0
		D-Serine	0	0	0
		D-Sorbitol	+	0	+++
		Glycerol	0	+	++
		L-Fucose	0	0	0
		D-Glucuronic Acid	0	0	0
		D-Gluconic Acid	0	+	0
		D,L-a-Glycerol-Phosphate	0	0	0
		D-Xylose	+	0	+
		L-Lactic Acid	0	0	0
		Formic Acid	0	0	0
		D-Mannitol	0	0	+++
		L-Glutamic Acid	0	0	0
		D-Glucose-6-Phosphate	0	0	0
		D-Galactonic Acid-y-Lactone	0	0	0
		D,L-Malic Acid	+	+	0
		D-Ribose	++	++	+++
		Tween 20	+	+++	+++
		L-Rhamnose	0	0	+++
		D-Fructose	++	+++	+++
		Acetic Acid	0	0	+
		a-D-Glucose	+	+++	++
		Maltose	+	0	+
		D-Melibiose	0	0	0
		Thymidine	0	0	0
		L-Asparagine	0	+	++
		D-Aspartic Acid	0	0	0
		D-Glucosaminic Acid	0	0	0
		1,2-Propanediol	0	0	0
		Tween 40	+	+++	+++
		a-Keto-Glutaric Acid	0	0	+++
		a-Keto-Butyric Acid	0	0	0
		a-Methyl-D-Galactoside	0	0	0
		a-D-Lactose	0	0	0
		Lactulose	0	0	0
		Sucrose	+	0	0
		Uridine	0	0	0
		L-Glutamine	0	++	+
		m-Tartaric Acid	0	0	0
		D-Glucose-1-Phosphate	0	0	+
		D-Fructose-6-Phosphate	0	0	0
		Tween 80	++	+++	+++
		a-Hydroxy Glutaric Acid-y-Lactone	0	0	0
		a-Hydroxy Butyric Acid	0	0	0
		b-Methyl-D-Glucoside	0	0	+++
		Adonitol	0	+	0
		Maltotriose	+	0	+
		2-Deoxy Adenosine	0	0	0
		Adenosine	0	0	0
		Glycyl-L-Aspartic Acid	0	0	0
		Citric Acid	0	0	++
		m-Inositol	0	0	0
		D-Threonine	0	0	0
		Fumaric Acid	0	0	+
		Fromo Succinic Acid	+	0	0
		Propionic Acid	0	0	0
		Mucic Acid	0	0	0
		Glycolic Acid	0	0	0
		Glyoxylic Acid	0	0	++
		D-Cellobiose	0	0	+++
		Inosine	0	0	0
		Glycyl-L-Glutamic Acid	0	0	0
		Tricarballylic Acid	0	0	0
		L-Serine	0	0	0
		L-Threonine	0	0	0
		L-Alanine	0	+	++
		L-Alanyl-Glycine	0	0	+++
		Acetoacetic Acid	0	0	0
		N-Acetyl-B-D-Mannosamine	0	0	0
		Mono Methyl Succinate	++	0	+++
		Methyl Pyruvate	0	0	+++
		D-Malic Acid	0	0	0
		L-Malic Acid	+	0	++
		Glycyl-L-Proline	0	0	0
		p-Hydroxy Phenyl Acetic Acid	0	0	0
		m-Hydroxy Phenyl Acetic Acid	0	0	0
		Tyramine	0	0	0
		D-Psicose	0	0	+
		L-Lyxose	++	++	++
		Glucuronamide	0	0	0
		Pyruvic Acid	0	+	+++
		L-Galactonic Acid-y-Lactone	0	0	0
		D-Galacturonic Acid	0	0	0
		Phenylethyl-amine	0	0	0
		2-Aminoethanol	0	0	0
		Chondroitin Sulfate C	0	0	0
		a-Cyclodextrin	0	0	0
		B-Cyclodextrin	+	0	0
		y-Cyclodextrin	0	0	0
		Dextrin	+	++	0
		Gelatin	0	+	++
		Glycogen	0	+++	0
		Inulin	+	0	0
		Laminarin	+	++	++
		Mannan	+	++	0
		Pectin	0	0	0
		N-Acetyl-D-Galactosamine	+	0	0
		N-Acetyl-Neuraminic Acid	+	0	0
		B-D-Allose	0	0	0
		Amygdalin	+	0	++
		D-Arabinose	+++	+++	0
		D-Arabitol	0	0	0
		L-Arabitol	0	0	0
		Arbutin	0	0	+
		2-Dexoy-D-Ribose	++	++	+
		i-Erythritol	0	0	0
		D-Fucose	0	0	0
		3-0-B-D-Galacto-pyrnosyl-D-Arabinose	0	0	0
		Gentiobiose	+	+	+++
		L-Glucose	0	0	0
		Lacitol	0	0	0
		D-Melezitose	++	0	0
		Maltitol	+	0	0
		A-MethylD-Glucoside	+	0	0
		B-Methyl-D-Galactoside	0	0	0
		3-MethylGlucose	0	0	0
		b-Methyl-D-Glucuronic Acid	0	0	0
		a-Methyl-D-Mannoside	+	0	0
		B-Methyl-D-Xyloside	0	0	0
		Palationse	++	0	0
		D-Raffionse	0	0	0
		Salicin	+	0	0
		Sedoheptulosan	0	0	0
		L-Sorbose	0	0	0
		Stachyose	0	0	0
		D-Tagatose	+	0	0
		Turanose	++	0	0
		Xylitol	0	0	0
		N-Acetyl-D-Glucosaminitol	0	0	0
		y-Amino Butyric Acid	+	0	0
		delta-Amino Valeric Acid	+	++	0
		Butyric Acid	0	++	0
		Capric Acid	0	0	0
		Caproic Acid	0	0	0
		Citraconic Acid	0	0	0
		Citramalic Acid	+	0	0
		D-Glucosamine	0	+++	0
		2-Hydroxy Benozic Acid	0	0	0
		4-Hydroxy Benzoic Acid	0	0	0
		B-Hydroxy Butyric Acid	0	0	0
		y-Hydroxy Butyric Acid	0	0	+
		a-Keto-Valeric Acid	0	0	0
		Itaconic Acid	0	0	0
		5-Keto-D-Gluconic Acid	+++	+++	++
		D-Lactic Acid Methyl Ester	0	+	+
		Malonic Acid	0	0	0
		Melibionic Acid	0	0	0
		Oxalic Acid	0	0	0
		Oxalomalic Acid	0	0	0
		Quinic Acid	0	0	0
		D-Ribono-1,4-Lactone	0	0	0
		Sebacic Acid	0	0	0
		Sorbic Acid	0	0	0
		Succinamic Acid	+	0	0
		D-Atartaric Acid	0	0	0
		L-Tartaric Acid	0	0	0
		Acetamide	0	0	0
		L-Alaninamide	0	+	++
		N-Acetyl-L-Glutamic Acid	0	0	0
		L-Arginine	0	0	0
		Glycine	0	0	0
		L-Histidine	0	0	0
		L-Homoserine	0	0	0
		Hydroxy-L-proline	0	0	0
		L-Isoleucine	0	+	0
		L-Leucine	0	0	0
		L-Lysine	+	+	0
		L-Methionine	0	0	0
		L-Omithine	+	0	0
		L-Phenylalanine	0	0	0
		L-Pyroglutamic Acid	+	+	0
		L-Valine	0	+	0
		D,L-Carnitine	0	0	0
		Sec-Butylamine	0	0	0
		D,L-Octopamine	+	0	0
		Putrescine	0	+	0
		Dihydroxy Acetone	0	++	++
		2,3-Butanediol	+	0	0
		2,3-Butanedione	+	0	0
		3-Hydroxy 2-Butanone	0	0	0
